# Supplementary material
Source: PubMed Central journal article supplement (PMC5669812)
Supplement: NIHMS909800-supplement.pdf [file NIHMS909800-supplement.pdf]

## **SUPPORTING INFORMATION**

**Disassembly/Reassembly Strategy for the Production of Highly Pure GroEL, a Tetradecameric Supramolecular Machine, Suitable for Quantitative NMR, EPR and Mutational Studies.**

Marielle A. Wälti<sup>1</sup> and G. Marius Clore<sup>1,\*</sup>

<sup>1</sup>Laboratory of Chemical Physics, National Institute of Diabetes and Digestive and Kidney Diseases, National Institutes of Health, Bethesda, MD 20892-0520

6 Supplementary Figures

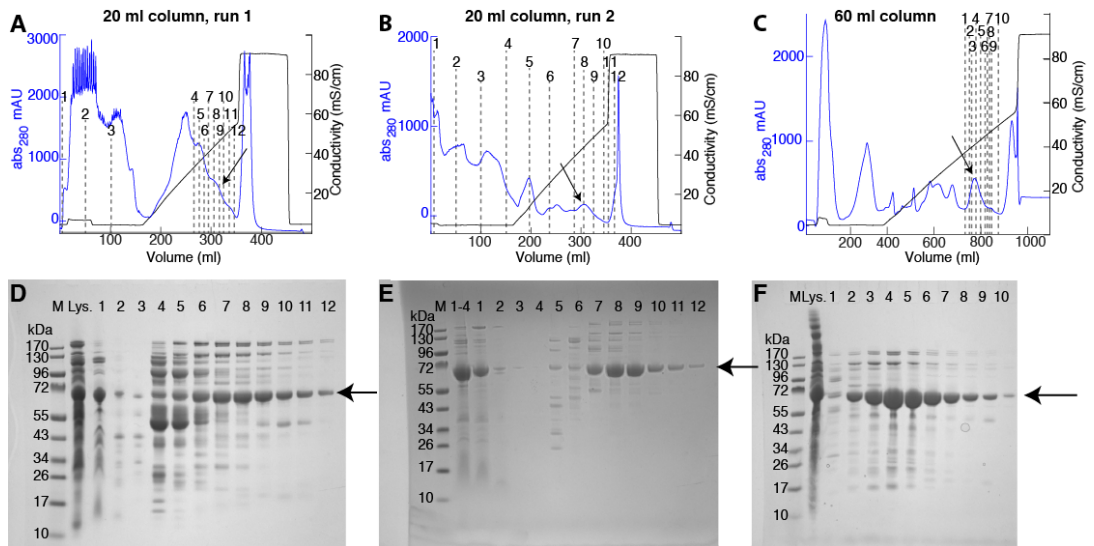

**Fig. S1. Analysis of fractions obtained from ion exchange chromatography during the course of the standard GroEL purification.** Elution profiles from the first (A) and second (B) runs through a standard 20 ml ion exchange column compared to the elution profile from the self-packed 60 ml ion exchange column (C). The arrows indicate the fractions containing GroEL. The protein was loaded and washed in 50 mM Tris pH 8, 5 mM MgCl<sub>2</sub>, 2 mM EDTA, 2 mM DTT, and eluted with a gradient from 0 to 0.56 M NaCl (black line). The elution profile shows many overlapping peaks in (A) and (B), but much better separation in (C). (D), (E) and (F), respective coomassie-stained SDS-PAGE (4-12% w/v) gels. (D) Lane 1: sample after cell lysis (Lys.); lanes 2-13: fractions (indicated with corresponding numbers) from the elution profile shown in (A). (E) Lane 1: flow-through from run 1, which was reloaded for a second run (corresponding to fractions 1-3 from run 1); lane 2-13: fractions from the elution profile shown in (B). (F) Lane 1: sample after cell lysis (Lys.); lane 2-11: fractions from the elution profile shown in (C). The band at around 60 kDa is attributed to GroEL (subunit theoretical MW = 57.1 kDa, indicated by arrows). M is the molecular weight standard with masses indicated in kDa.

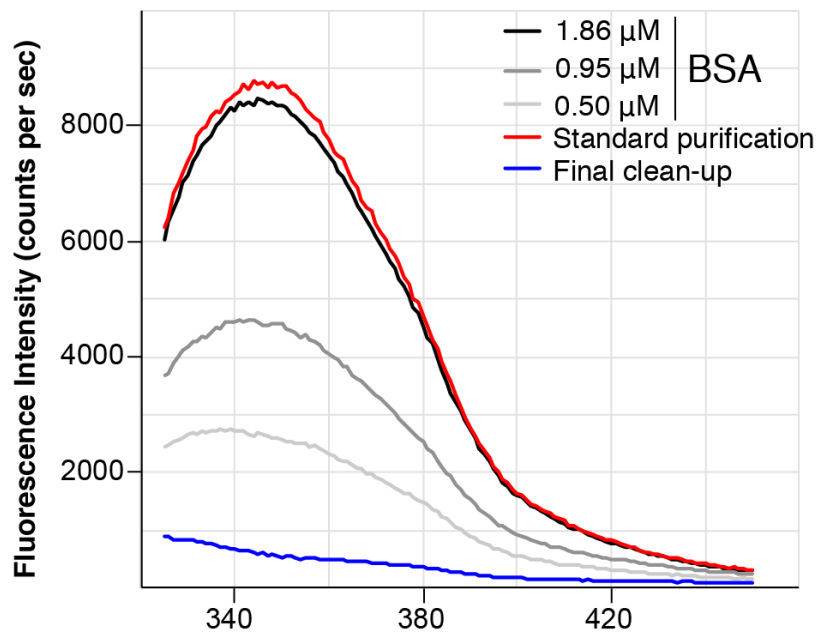

**Fig. S2. Tryptophan fluorescence to determine GroEL purity.** A standard calibration curve was performed with a dilution series of BSA (6 points between 0 and 2 μM), illustrated in the figure by three concentrations (0.5, 0.95 and 1.86 μM). The amount of protein impurities per GroEL tetradecamer (GroEL<sub>14</sub>) was estimated as 1.5-3 mol impurities per mol GroEL<sub>14</sub> with large sample to sample variability before the final clean-up (red curve) and 0.04-0.06 mol impurities per mol GroEL<sub>14</sub> after the final clean-up (blue curve).

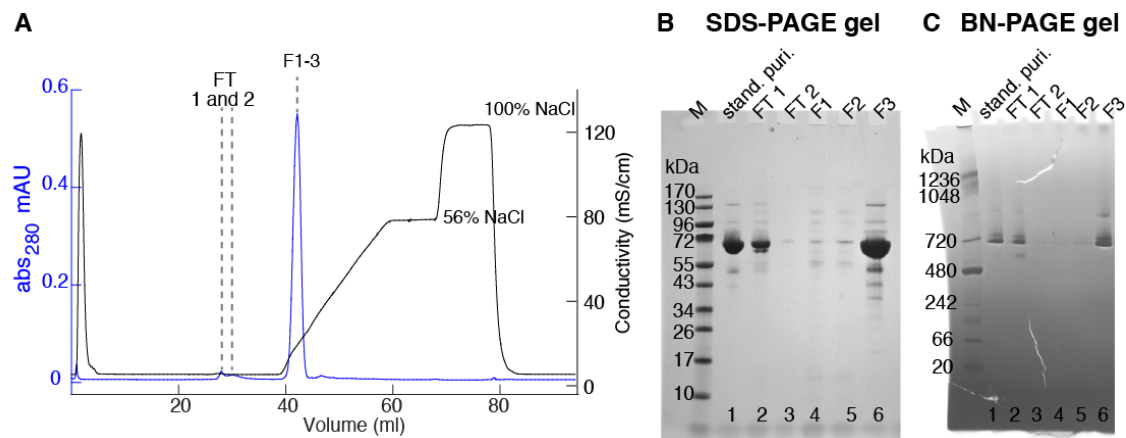

**Fig. S3. Disassembly and reassembly of GroEL without chaotropic agents using an ion exchange column and MgADP.** The elution profile is shown in (A) and the corresponding SDS PAGE and BN-PAGE analyses are shown in (B) and (C), respectively. 5 mM Mg-ATP was added to GroEL<sup>E315C</sup> after the standard purification. The sample was injected onto a 5 ml ion exchange column (HiTrap<sup>TM</sup> QFF) in 10 mM Tris, pH 7.4, 10 mM MgCl<sub>2</sub>, 2 mM DTT, 1 mM TCEP and 1 mM ADP at a flow rate of 2 ml/min. GroEL<sup>E315C</sup> was eluted with a gradient from 0-0.56 M NaCl within 4 column volumes. The column was washed for 2 column volumes at 0.56 M NaCl, followed by another 2 column volumes at 1 M NaCl. (B) and (C) Lane 1: GroEL<sup>E315C</sup> after the standard purification (stand. puri.) with 5 mM Mg-ADP; lanes 2 and 3: flow-through; lanes 4-6: GroEL<sup>E315C</sup> containing fractions. M is the molecular weight standard with masses indicated in kDa.

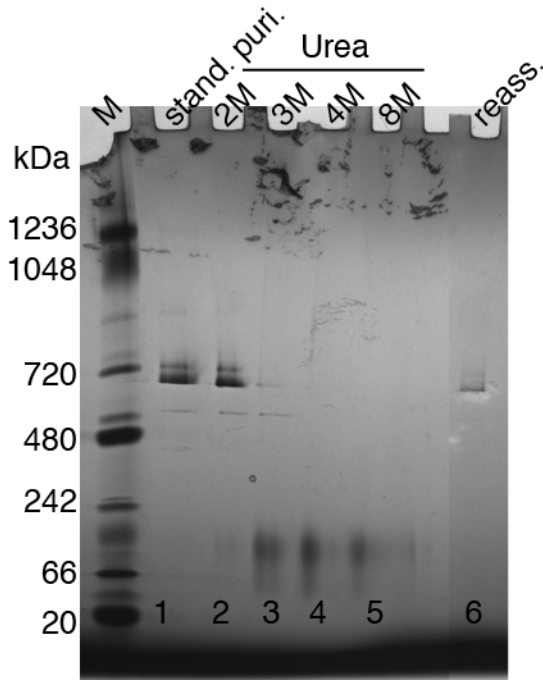

**Fig. S4. BN-PAGE analysis of the disassembly/reassembly reaction.** Lane 1: GroEL<sub>14</sub> (illustrated by the mutant GroEL<sup>E315C</sup>) after the standard purification (stand. puri.) with a band at 720 kDa. Lanes 2-5: different amounts of urea used to disassemble GroEL into monomers. Lane 6: the sample in 3 M urea was reassembled back into GroEL<sub>14</sub> by the addition of (NH<sub>4</sub>)<sub>2</sub>SO<sub>4</sub> and ATP (see Results section of main paper for details). M is the molecular weight standard with the masses indicated in kDa.

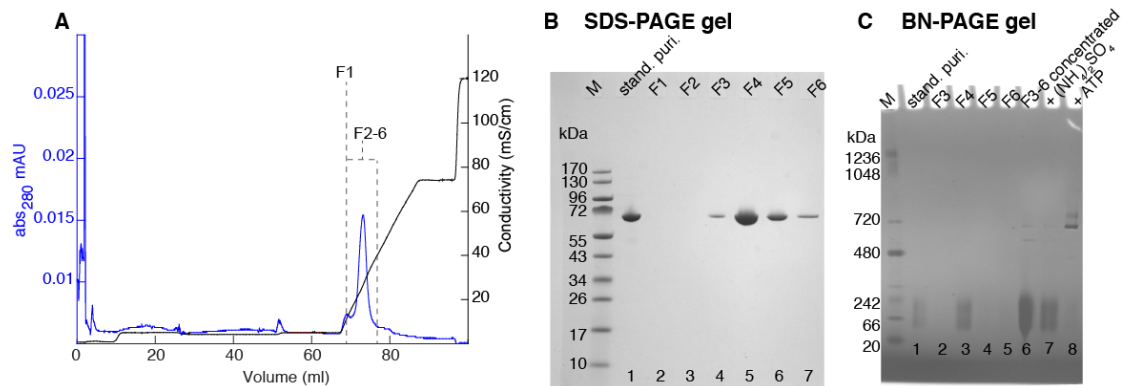

**Fig. S5. Analysis of the final clean-up using ion exchange chromatography in urea.** Elution profile (A) and corresponding SDS-PAGE (B), and BN-PAGE (C) analysis. GroEL, after the standard purification in 3 M urea, was loaded onto a 5 ml ion exchange column (HiTrap™ QFF) and washed in 10 mM Tris, pH 7.4, 10 mM MgCl<sub>2</sub>, 2 mM DTT, 1 mM TCEP, and 3 M urea at a flow rate of 2.5 ml/min. GroEL<sup>E315C</sup> was eluted with a gradient from 0 to 0.56 M NaCl within 4 column volumes. The column was washed for 2 column volumes at 0.56 M NaCl followed by another 2 column volumes at 1 M NaCl. (B) Lane1: GroEL<sup>E315C</sup> after the standard purification (stand. puri.) incubated overnight at 4 °C in 3 M urea; lanes 2-7: the collected fractions as shown in (A). (C) Lane1: GroEL<sup>E315C</sup> after the standard purification (stand. puri.) incubated overnight at 4 °C in 3 M urea; lanes 2-4: the GroEL containing fractions as shown in (A); lane 5: the pooled and concentrated GroEL sample; lanes 7-8: GroEL reassembly by the addition of (NH<sub>4</sub>)<sub>2</sub>SO<sub>4</sub> (lane 7) and ATP (lane 8) (for details see Results Section in main text). M is the molecular weight standard with the masses indicated in kDa.

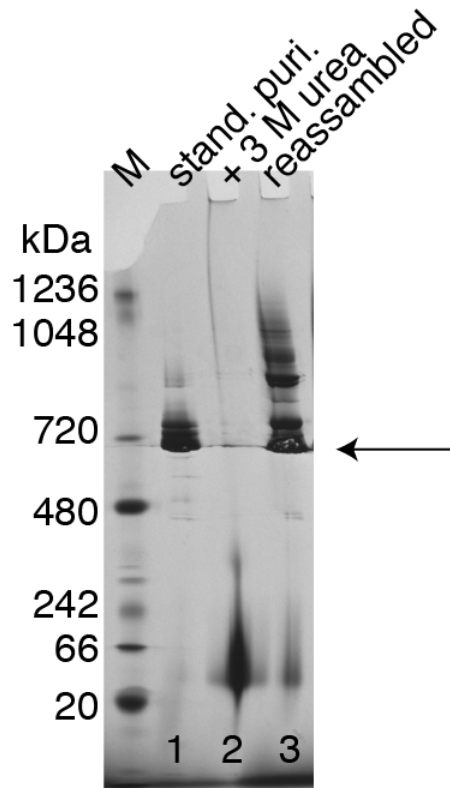

**Fig. S6. BN-PAGE analysis of reassembled GroEL without site-specific spin labeling.** Lane 1: GroEL<sup>E315C</sup> 14mer after the standard purification; lane 2: GroEL monomer after the addition of 3 M urea; lane 3: reassembly of GroEL before site specific spin-labeling. Reassembly was achieved by the addition of  $(\text{NH}_4)_2\text{SO}_4$  and ATP and results in higher mass species, probably due to cross-linking of different GroEL molecules by the free cysteines. M is the molecular weight standard with masses indicated in kDa. The band at 720 kDa depicts the GroEL<sub>14</sub> (indicated by the arrow) and the band at around 50 kDa is the monomer.
